# Supplementary material
Source: publisher figshare collection journal article supplement (https://acs.figshare.com/ndownloader/files/8876227)
Supplement: Supplementary file 1 [file 8876227]

## Supporting Information

# Properties of nanocelluloses and their application as rheology modifier in paper coating

*Chao Liu,<sup>†</sup> Haishun Du,<sup>†</sup> Lv Dong,<sup>†,‡</sup> Xin Wang,<sup>§</sup> Yuedong Zhang,<sup>†</sup> Guang Yu,<sup>†</sup> Bin Li,<sup>†,\*</sup>*

*Xindong Mu,<sup>†</sup> Hui Peng<sup>†,\*</sup>, Huizhou Liu<sup>†</sup>*

<sup>†</sup> CAS Key Laboratory of Bio-Based Material, Qingdao Institute of Bioenergy and Bioprocess Technology, Chinese Academy of Sciences, Qingdao, Shandong 266101, China

<sup>‡</sup> University of Chinese Academy of Sciences, Beijing 100049, China

<sup>§</sup> Department of Marine Chemistry & Geochemistry, College of Ocean and Earth Sciences, Xiamen University, Xiamen, 361005, China

## Corresponding Author

\*B. Li. Tel. +96-532-80662725. Fax: +86-532-80662724. E-mail: [libin@qibebt.ac.cn](mailto:libin@qibebt.ac.cn).

\*H. Peng. E-mail: [penghui@qibebt.ac.cn](mailto:penghui@qibebt.ac.cn).

**Table S1** Coating color formulations <sup>a</sup>

| Component | Control | SCN0.05 | SCN0.1 | SCN0.2 | SCN0.4 | TCN0.05 | TCN0.1 | TCN0.2 | TCN0.4 | FCN0.05 | FCN0.1 | FCN0.2 | FCN0.4 |
|-----------|---------|---------|--------|--------|--------|---------|--------|--------|--------|---------|--------|--------|--------|
| GCC       | 30      | 30      | 30     | 30     | 30     | 30      | 30     | 30     | 30     | 30      | 30     | 30     | 30     |
| KC        | 70      | 70      | 70     | 70     | 70     | 70      | 70     | 70     | 70     | 70      | 70     | 70     | 70     |
| Starch    | 6       | 6       | 6      | 6      | 6      | 6       | 6      | 6      | 6      | 6       | 6      | 6      | 6      |
| CMC       | 0.4     | 0       | 0      | 0      | 0      | 0       | 0      | 0      | 0      | 0       | 0      | 0      | 0      |
| SCN       | 0       | 0.05    | 0.1    | 0.2    | 0.4    | 0       | 0      | 0      | 0      | 0       | 0      | 0      | 0      |
| TCN       | 0       | 0       | 0      | 0      | 0      | 0.05    | 0.1    | 0.2    | 0.4    | 0       | 0      | 0      | 0      |
| FCN       | 0       | 0       | 0      | 0      | 0      | 0       | 0      | 0      | 00     | 0.05    | 0.1    | 0.2    | 0.4    |

<sup>a</sup> Component amounts are given in parts per hundred (pph, by weight) based on 100 parts by weight of pigment; Solids content (including pigments and starch) of the coating colors were 50% by dry weight.

**Table S2** Comparison on the viscosity of coating colors at the given shear rates

| Coating colors                                        | Control | SCN0.1 | TCN0.1 | FCN0.1 |
|-------------------------------------------------------|---------|--------|--------|--------|
| Viscosity (Pa·s) at shear rate of 0.3 s <sup>-1</sup> | 200     | 2510   | 1070   | 476    |
| Viscosity (Pa·s) at shear rate of 1.0 s <sup>-1</sup> | 74      | 825    | 452    | 177    |
